# Supplementary material for: Mir-4728 is a Valuable Biomarker for Diagnostic and Prognostic Assessment of HER2-Positive Breast Cancer
Source: Front Mol Biosci. 2022 May 17;9:818493. doi: 10.3389/fmolb.2022.818493 (PMC9152170; doi:10.3389/fmolb.2022.818493)
Supplement: Supplementary file 1 [file Table1.xlsx]

## Sheet: her2 positive-negative
The differential expression of pre-miRNAs in HER2-positive breast cancer patients compared with HER2-negative patients
	logFC	AveExpr	t	P.Value	adj.P.Val
hsa-mir-4728	2.12752	0.861661	17.3672	7.83705e-59	8.10351e-56
hsa-mir-184	0.768845	2.9484	3.17009	0.00157307	0.0139022
hsa-mir-375	0.736982	13.1282	4.08026	4.87906e-05	0.000974294
hsa-mir-210	0.730912	8.48037	4.76887	2.14536e-06	0.000116753
hsa-mir-3150b	0.692525	0.467154	4.71784	2.74402e-06	0.00013511
hsa-mir-2115	0.679317	-0.719588	4.01348	6.4575e-05	0.00119233
hsa-mir-1269a	0.595264	0.67517	1.99871	0.0459263	0.160976
hsa-mir-203a	0.532677	11.8496	3.49261	0.000500541	0.00595537
hsa-mir-323b	0.531428	1.41457	4.30804	1.81978e-05	0.00045894
hsa-mir-3156-2	0.517737	-1.8256	4.42973	1.05407e-05	0.000338436
hsa-mir-767	0.501085	-0.693154	2.2382	0.0254406	0.105193
hsa-mir-425	0.483561	8.45184	5.38359	9.21912e-08	8.66597e-06
hsa-mir-3619	0.477083	-1.29212	3.96786	7.80199e-05	0.00135633
hsa-mir-3677	0.461886	2.98464	4.01666	6.37255e-05	0.00119233
hsa-mir-412	0.458765	1.71558	3.12148	0.00185424	0.0161117
hsa-mir-4661	0.457868	1.42483	3.96397	7.92813e-05	0.00135633
hsa-mir-105-1	0.434785	-0.452875	1.8765	0.0608949	0.193739
hsa-mir-4791	0.431202	-1.39159	4.16052	3.46525e-05	0.000731238
hsa-mir-552	0.422818	-1.83166	4.2339	2.52148e-05	0.000579381
hsa-mir-329-1	0.419561	-1.43412	4.32409	1.69461e-05	0.00044705
hsa-mir-2114	0.417257	-0.764071	2.79889	0.00523246	0.0358302
hsa-mir-196a-2	0.406122	7.56056	2.16107	0.0309414	0.121648
hsa-mir-539	0.404443	2.92633	4.07039	5.08682e-05	0.000992409
hsa-mir-301a	0.402887	3.70344	3.72846	0.000204132	0.00301533
hsa-mir-196a-1	0.400755	7.28062	2.11704	0.034518	0.131219
hsa-mir-105-2	0.400442	-0.538209	1.70637	0.0882691	0.244366
hsa-mir-3678	0.399899	-0.732148	3.34689	0.000849539	0.00915024
hsa-mir-323a	0.391983	1.25697	3.7192	0.000211655	0.00308242
hsa-mir-199b	0.380696	11.9379	4.57675	5.35362e-06	0.000221426
hsa-mir-4501	0.377255	-0.779987	2.43504	0.0150747	0.0745801
hsa-mir-203b	0.373504	4.54264	1.90465	0.0571295	0.184471
hsa-mir-149	0.366299	6.46906	2.59203	0.00968865	0.0567745
hsa-mir-187	0.362765	3.19357	1.70198	0.0890887	0.245647
hsa-mir-192	0.35236	8.75277	4.42962	1.05461e-05	0.000338436
hsa-mir-301b	0.352335	0.0531631	2.77154	0.00568901	0.0384473
hsa-mir-20b	0.348444	4.32571	2.48043	0.013296	0.0688727
hsa-mir-2277	0.346033	-0.125475	3.20088	0.00141592	0.0130719
hsa-mir-1284	0.341947	-1.31404	3.07518	0.00216436	0.018292
hsa-mir-199a-2	0.336391	11.5506	4.19679	2.96311e-05	0.000648973
hsa-mir-345	0.33363	4.13707	3.48962	0.00050609	0.00595537
hsa-mir-191	0.332294	9.94789	4.11227	4.25971e-05	0.000880907
hsa-mir-199a-1	0.329559	10.7735	4.24785	2.3723e-05	0.000570455
hsa-mir-134	0.321308	8.23399	3.495	0.000496123	0.00595537
hsa-mir-33a	0.310982	3.77698	3.03346	0.0024839	0.0202232
hsa-mir-548au	0.305577	-1.59201	3.29448	0.00102275	0.010369
hsa-mir-449a	0.300408	0.100534	1.3065	0.191702	0.390966
hsa-mir-4638	0.299728	0.0470517	2.51327	0.0121275	0.0648451
hsa-mir-4446	0.299224	-1.32403	2.38122	0.0174532	0.0827824
hsa-mir-136	0.298033	4.94695	3.52526	0.000443415	0.00559349
hsa-mir-3156-1	0.297443	-1.80524	2.50048	0.0125714	0.0663205
hsa-mir-616	0.295434	1.49964	2.8879	0.00396693	0.0288859
hsa-mir-1269b	0.289353	-1.24261	1.67612	0.0940464	0.251276
hsa-mir-4756	0.278683	-1.89315	2.83105	0.00473814	0.0328808
hsa-mir-3156-3	0.275282	-1.96055	2.75774	0.00593285	0.0394997
hsa-mir-548t	0.27075	-1.80377	3.2153	0.00134739	0.0126655
hsa-mir-485	0.26572	1.65331	2.62844	0.00871716	0.0531273
hsa-mir-6884	0.264557	-2.15342	4.23449	2.51503e-05	0.000579381
hsa-mir-615	0.262313	2.85688	2.19769	0.0282136	0.112203
hsa-mir-570	0.260178	-1.20338	2.38853	0.0171118	0.0815375
hsa-mir-3614	0.258262	1.51833	2.03469	0.0421615	0.151751
hsa-mir-6715a	0.254915	-1.90238	2.749	0.00609206	0.0401222
hsa-mir-6761	0.250723	-0.507614	2.19827	0.028172	0.112203
hsa-mir-7158	0.249819	-2.30316	4.96453	8.17117e-07	5.144e-05
hsa-mir-4523	0.246826	-1.93489	3.1933	0.00145317	0.013171
hsa-mir-3664	0.245411	-0.596283	1.98454	0.0474849	0.164212
hsa-mir-1254-2	0.241722	-1.1489	2.36376	0.0182923	0.0850825
hsa-mir-493	0.241039	3.37739	2.62775	0.00873467	0.0531273
hsa-mir-4326	0.239375	2.17241	1.46428	0.14345	0.326711
hsa-mir-1266	0.237252	3.5839	2.36389	0.0182861	0.0850825
hsa-mir-5698	0.23536	-0.414939	1.92035	0.0551156	0.183542
hsa-mir-142	0.23508	10.9433	2.03364	0.0422673	0.151751
hsa-mir-4726	0.234154	-1.57223	2.23276	0.0257991	0.105702
hsa-mir-431	0.23393	2.95053	2.27731	0.0229908	0.0981604
hsa-mir-127	0.233343	9.35969	2.6414	0.00839304	0.0519665
hsa-mir-4763	0.229765	-1.65986	2.57644	0.0101336	0.0585368
hsa-mir-504	0.228675	0.118331	1.72987	0.08398	0.237993
hsa-mir-181b-1	0.226738	7.50939	3.02553	0.00254932	0.0204341
hsa-mir-1293	0.224739	-2.01935	2.78594	0.0054443	0.0370355
hsa-mir-3662	0.222442	-1.07472	1.69462	0.0904773	0.246843
hsa-mir-3191	0.218601	-1.40006	2.25763	0.024197	0.10065
hsa-mir-148a	0.217638	15.3384	2.51494	0.0120707	0.0648451
hsa-mir-181a-1	0.215074	9.82839	3.07357	0.00217594	0.018292
hsa-mir-4662a	0.213224	4.35314	2.03769	0.04186	0.151751
hsa-mir-6762	0.21238	-2.04806	2.98157	0.0029415	0.0226978
hsa-mir-376a-1	0.210688	-0.0569348	1.86787	0.0620903	0.195141
hsa-mir-573	0.210529	-2.15094	3.30657	0.000980133	0.0102369
hsa-mir-589	0.209615	5.90984	3.41582	0.000663049	0.00754653
hsa-mir-409	0.208088	4.95706	2.59096	0.00971865	0.0567745
hsa-mir-181b-2	0.206029	7.30421	2.57782	0.0100935	0.0585368
hsa-mir-376a-2	0.204743	-1.25234	2.11988	0.034277	0.130784
hsa-mir-1234	0.204507	-2.14816	3.41536	0.000664153	0.00754653
hsa-mir-454	0.201929	3.29688	2.6963	0.00713639	0.0455201
hsa-mir-3074	0.201604	3.46293	2.16446	0.0306795	0.121543
hsa-mir-548aw	0.200444	-1.421	2.30899	0.0211595	0.0927402
hsa-mir-1277	0.200224	0.0946654	1.79336	0.0732353	0.220885
hsa-mir-4649	0.199932	-1.59691	2.22879	0.0260629	0.105811
hsa-mir-758	0.199771	3.74313	1.90854	0.0566249	0.18412
hsa-mir-708	0.199183	6.80832	2.67049	0.00770449	0.0479906
hsa-mir-2355	0.197762	5.4233	3.14104	0.00173597	0.0152118
hsa-mir-382	0.196419	4.29737	2.28697	0.0224185	0.0969906
hsa-mir-5089	0.19593	-2.03929	2.40667	0.0162899	0.0787094
hsa-mir-423	0.194786	7.25129	3.76454	0.000177177	0.00266804
hsa-mir-1307	0.194103	10.0645	2.60479	0.00933785	0.0558112
hsa-mir-183	0.193793	13.7475	2.13191	0.0332726	0.127895
hsa-mir-4724	0.193416	-0.369642	1.29199	0.196676	0.397899
hsa-mir-940	0.193126	1.74088	1.64762	0.0997637	0.258974
hsa-mir-369	0.191712	2.89444	2.0186	0.0438117	0.155141
hsa-mir-215	0.186606	1.98825	1.67787	0.0937046	0.251012
hsa-mir-193b	0.18614	6.74579	2.37489	0.0177534	0.0838219
hsa-mir-3150a	0.185949	-1.92375	2.31737	0.020697	0.092288
hsa-mir-196b	0.18063	7.68729	1.60312	0.109242	0.26828
hsa-mir-4742	0.180247	-0.184928	1.74522	0.0812716	0.23214
hsa-mir-33b	0.176335	2.21447	1.24106	0.214894	0.417938
hsa-mir-6501	0.175368	-1.37086	1.69466	0.0904699	0.246843
hsa-mir-7702	0.173765	-0.501551	1.20406	0.228868	0.43422
hsa-mir-296	0.172688	1.66408	1.40368	0.160744	0.34918
hsa-mir-370	0.171981	2.87861	1.85297	0.0641983	0.201155
hsa-mir-885	0.169363	-0.647682	1.05356	0.292356	0.520409
hsa-mir-3200	0.168959	1.43382	1.2883	0.197957	0.398225
hsa-mir-3136	0.166928	-1.05253	1.64322	0.10067	0.258974
hsa-mir-21	0.165127	17.7113	3.57945	0.000361877	0.00482623
hsa-mir-495	0.164549	2.39098	1.78912	0.0739167	0.221579
hsa-mir-22	0.164323	15.9583	2.96181	0.00313506	0.0238357
hsa-mir-6509	0.163241	-0.705733	1.62876	0.103698	0.259247
hsa-mir-3064	0.162878	-1.28206	1.72433	0.0849759	0.238764
hsa-mir-548v	0.162834	0.132948	1.42531	0.154397	0.339674
hsa-mir-154	0.161538	2.42274	1.8295	0.0676407	0.208156
hsa-mir-181a-2	0.160375	10.4504	2.84482	0.00453987	0.0324498
hsa-mir-654	0.159603	3.88777	1.57739	0.115041	0.279231
hsa-mir-5580	0.159499	-2.30833	3.23312	0.00126698	0.0121301
hsa-mir-3170	0.159182	0.659859	1.33241	0.183047	0.378541
hsa-mir-193a	0.159039	8.62313	2.50545	0.0123971	0.0657366
hsa-mir-582	0.155355	6.91793	1.64052	0.10123	0.258974
hsa-mir-6773	0.153514	-2.11271	2.30975	0.0211171	0.0927402
hsa-mir-3934	0.153446	0.451154	1.46804	0.142427	0.325817
hsa-mir-5684	0.15094	-0.610639	1.38411	0.166652	0.356766
hsa-mir-337	0.150003	4.68205	1.44031	0.150111	0.333794
hsa-mir-363	0.149746	3.27112	1.07386	0.283159	0.512761
hsa-mir-10a	0.146818	14.2801	1.26898	0.204762	0.407946
hsa-mir-4652	0.146661	-1.72465	1.17074	0.241998	0.455784
hsa-mir-503	0.141876	3.54897	1.37938	0.168104	0.358391
hsa-mir-126	0.14154	11.4771	1.76664	0.0776127	0.226013
hsa-mir-655	0.137311	0.81753	1.22054	0.222567	0.428556
hsa-mir-7844	0.136768	-2.12922	2.27955	0.022857	0.0980672
hsa-mir-214	0.134867	4.8729	1.52736	0.127007	0.301897
hsa-mir-618	0.132454	-0.917236	1.00049	0.317329	0.548471
hsa-mir-34a	0.131923	7.02927	2.14107	0.0325239	0.125954
hsa-mir-1270	0.131895	0.547315	0.993811	0.32057	0.549379
hsa-mir-1185-1	0.131804	-1.61801	1.63619	0.102134	0.259247
hsa-mir-379	0.126497	9.00274	1.24181	0.214615	0.417938
hsa-mir-1301	0.12567	3.75007	1.64338	0.100637	0.258974
hsa-mir-6779	0.123154	-2.18704	2.03998	0.041631	0.151572
hsa-mir-501	0.122556	5.32407	1.62576	0.104335	0.259957
hsa-mir-889	0.121616	3.1831	1.13266	0.257645	0.479521
hsa-mir-3127	0.120839	2.91928	1.33926	0.180808	0.375413
hsa-mir-194-2	0.120081	6.49219	1.78903	0.0739312	0.221579
hsa-mir-3651	0.117771	-0.186553	0.984508	0.325118	0.55029
hsa-mir-3607	0.114999	5.86556	0.86631	0.386541	0.612013
hsa-mir-3927	0.113937	-2.31004	2.3279	0.0201281	0.0920904
hsa-mir-4777	0.113918	-1.52416	1.31664	0.18828	0.385684
hsa-mir-4752	0.11375	-2.37732	3.29486	0.00102139	0.010369
hsa-mir-331	0.113091	4.92059	1.47972	0.139281	0.32075
hsa-mir-6739	0.112927	-2.14254	1.91041	0.0563842	0.183915
hsa-mir-450b	0.112854	3.91967	1.34033	0.18046	0.375413
hsa-mir-6882	0.112788	-2.05643	1.77781	0.0757567	0.224562
hsa-mir-466	0.111542	-2.19704	1.94455	0.0521262	0.178472
hsa-mir-6726	0.110766	-2.02417	1.72608	0.0846612	0.238528
hsa-mir-194-1	0.110623	6.30943	1.62834	0.103787	0.259247
hsa-mir-148b	0.11002	7.5526	1.74783	0.0808197	0.231489
hsa-mir-496	0.109704	0.727659	0.898264	0.369274	0.595296
hsa-mir-130b	0.10969	4.37768	1.62828	0.103799	0.259247
hsa-mir-2117	0.108589	-2.31437	2.53328	0.0114611	0.0637118
hsa-mir-628	0.107565	4.739	0.935291	0.349878	0.577913
hsa-mir-4727	0.106886	-2.10308	1.79828	0.072452	0.220339
hsa-mir-424	0.106311	6.83771	1.27665	0.202039	0.405648
hsa-mir-659	0.106182	0.560569	1.13813	0.255353	0.476598
hsa-mir-3129	0.104698	-1.13384	0.95897	0.337819	0.564306
hsa-mir-4674	0.104422	-1.9817	1.45781	0.145227	0.32897
hsa-mir-25	0.104006	13.1539	1.80916	0.0707451	0.215783
hsa-mir-3198-2	0.103225	-2.22594	2.01474	0.0442158	0.156038
hsa-mir-152	0.103089	7.72604	1.35144	0.176878	0.371732
hsa-mir-4645	0.100937	-1.61596	1.21232	0.225693	0.431362
hsa-mir-4797	0.100887	-1.75398	1.2901	0.197333	0.397899
hsa-mir-4734	0.0999794	-2.31576	2.4683	0.013752	0.0702703
hsa-mir-4720	0.0997684	-2.39768	3.04074	0.00242517	0.020061
hsa-mir-185	0.099376	5.82512	1.759	0.0789016	0.226623
hsa-mir-1908	0.0984493	-2.32789	2.54415	0.0111131	0.062113
hsa-mir-6854	0.097336	-0.318271	0.953273	0.340696	0.565457
hsa-mir-592	0.0962187	1.52672	0.7116	0.476889	0.687731
hsa-mir-4725	0.0958145	-2.04849	1.50408	0.132897	0.312307
hsa-mir-1306	0.0942456	2.96127	1.21931	0.223033	0.428654
hsa-mir-542	0.0940795	7.73153	1.06734	0.286094	0.513578
hsa-mir-492	0.0928969	-2.22629	1.77549	0.0761396	0.224562
hsa-mir-8072	0.0927572	-1.99311	1.48102	0.138936	0.320669
hsa-mir-421	0.0904551	1.24592	0.992587	0.321166	0.549379
hsa-mir-1287	0.0898531	5.02096	1.23959	0.215436	0.417938
hsa-mir-6516	0.0895044	-1.31775	0.91842	0.358634	0.585547
hsa-mir-3617	0.0888853	-2.30565	1.93632	0.0531273	0.179502
hsa-mir-4536-1	0.0888113	-2.07443	1.3977	0.162532	0.351586
hsa-mir-548q	0.0884596	-2.04164	1.40476	0.160421	0.34918
hsa-mir-4717	0.0883154	-2.21448	1.71429	0.0868043	0.241278
hsa-mir-599	0.0876958	-2.30748	2.00754	0.044977	0.158185
hsa-mir-668	0.0858568	-2.24291	2.07669	0.0381001	0.141202
hsa-mir-19a	0.0854	4.43564	0.863526	0.388068	0.612013
hsa-mir-4700	0.0853992	-2.13695	1.5111	0.131098	0.309486
hsa-mir-3679	0.0850758	-2.26622	1.91061	0.0563573	0.183915
hsa-mir-6506	0.0847261	-2.09626	1.38777	0.165534	0.355596
hsa-mir-6799	0.0822175	-2.33393	2.23179	0.0258632	0.105702
hsa-mir-4802	0.0810087	-1.82312	1.03069	0.302948	0.531831
hsa-mir-5009	0.0806789	-2.28334	1.76222	0.0783559	0.226623
hsa-mir-6795	0.0778501	-2.31857	1.8732	0.0613496	0.193992
hsa-mir-1245a	0.0773918	1.30422	0.695023	0.487212	0.694866
hsa-mir-1294	0.0753746	-1.80552	1.00586	0.314739	0.546959
hsa-mir-3682	0.0747731	-0.31335	0.691048	0.489706	0.6965
hsa-mir-3189	0.0741166	-2.25034	1.44152	0.14977	0.333794
hsa-mir-6891	0.0729619	-2.0052	1.04503	0.296275	0.52547
hsa-mir-450a-1	0.0722877	1.97648	0.762725	0.445818	0.6622
hsa-mir-99b	0.0713368	15.1306	0.95459	0.34003	0.565258
hsa-mir-1289-1	0.0708123	-2.35097	1.91677	0.0555691	0.183915
hsa-mir-4526	0.0705506	-2.13532	1.1264	0.260281	0.4823
hsa-mir-1256	0.0675881	-2.24059	1.3875	0.165616	0.355596
hsa-mir-6886	0.0672848	-2.37679	2.30712	0.0212639	0.0927717
hsa-mir-432	0.0667714	2.00743	0.568188	0.570043	0.745263
hsa-mir-4657	0.066763	-2.08467	1.08966	0.276141	0.504242
hsa-mir-627	0.0667016	0.196489	0.684487	0.493836	0.697472
hsa-mir-9-3	0.0654346	7.98871	0.379819	0.704165	0.852392
hsa-mir-4512	0.0651355	-2.4099	2.68902	0.00729275	0.0459799
hsa-mir-450a-2	0.0649949	1.96424	0.669859	0.503112	0.702077
hsa-mir-96	0.0637441	4.94465	0.635879	0.52501	0.720552
hsa-mir-629	0.0635963	6.90695	0.985124	0.324816	0.55029
hsa-mir-103a-1	0.0635372	13.1798	0.963165	0.335712	0.562603
hsa-mir-3131	0.0632695	-2.35091	1.71663	0.0863757	0.240734
hsa-mir-6727	0.0632493	-2.28994	1.39324	0.163875	0.35375
hsa-mir-614	0.0629591	-2.33753	1.64585	0.100129	0.258974
hsa-mir-106a	0.0617211	3.91554	0.591181	0.554541	0.738673
hsa-mir-4746	0.0611577	1.21237	0.577698	0.563606	0.740494
hsa-mir-487b	0.0605267	1.795	0.592641	0.553564	0.738673
hsa-mir-9-1	0.0601285	7.97893	0.350883	0.725755	0.864911
hsa-mir-376c	0.0596201	1.77375	0.583656	0.559591	0.739971
hsa-mir-5092	0.0593923	-2.00141	0.863878	0.387875	0.612013
hsa-mir-23a	0.0589501	11.5494	1.05274	0.29273	0.520409
hsa-mir-6748	0.0582726	-2.06701	0.897628	0.369613	0.595296
hsa-mir-3166	0.0576559	-2.2426	1.05233	0.292919	0.520409
hsa-mir-3613	0.0573645	3.40402	0.878252	0.380031	0.608285
hsa-mir-4667	0.0560072	-2.30592	1.2723	0.20358	0.407946
hsa-mir-3158-2	0.0559282	-2.03235	0.93047	0.352366	0.579361
hsa-mir-4666a	0.055817	-2.22783	1.0391	0.299025	0.52763
hsa-mir-3198-1	0.0556003	-2.36674	1.64526	0.10025	0.258974
hsa-mir-374a	0.0555469	9.43913	0.917664	0.35903	0.585547
hsa-mir-4639	0.0555117	-2.22468	0.988627	0.323099	0.55029
hsa-mir-3658	0.0552964	-2.41359	2.03416	0.0422151	0.151751
hsa-mir-559	0.0550993	-2.17838	1.01998	0.308001	0.537198
hsa-mir-93	0.0545134	12.1554	0.717777	0.473073	0.685094
hsa-mir-4470	0.0543478	-1.83351	0.750545	0.453114	0.666458
hsa-mir-211	0.0538801	-2.19254	0.996083	0.319465	0.549379
hsa-mir-145	0.053859	10.1527	0.688835	0.491096	0.696876
hsa-mir-3174	0.0536631	-1.67219	0.61764	0.536962	0.728331
hsa-mir-4517	0.0534707	-2.23419	0.949486	0.342617	0.567067
hsa-mir-3175	0.053262	-2.37782	1.67388	0.0944851	0.251798
hsa-mir-4753	0.0532285	-2.03193	0.809184	0.418613	0.638416
hsa-mir-506	0.0530071	-2.07494	0.759556	0.44771	0.662569
hsa-mir-590	0.0520488	4.05278	0.761788	0.446377	0.6622
hsa-mir-509-3	0.0519704	-0.0229582	0.469211	0.639027	0.804817
hsa-mir-4793	0.0519489	-2.27972	1.14819	0.251183	0.471367
hsa-mir-1283-2	0.0515136	-2.21436	0.709073	0.478454	0.688069
hsa-mir-576	0.0511843	3.50733	0.70929	0.47832	0.688069
hsa-mir-6787	0.0504334	-2.396	1.70573	0.0883878	0.244366
hsa-mir-24-2	0.0503091	9.24563	0.916536	0.35962	0.585586
hsa-mir-549a	0.0502105	-1.99187	0.69558	0.486863	0.694866
hsa-mir-548y	0.050028	-2.28994	0.815984	0.414716	0.636225
hsa-mir-182	0.0494869	15.2158	0.593791	0.552794	0.738673
hsa-mir-874	0.0489438	4.65172	0.67544	0.499562	0.700855
hsa-mir-3944	0.0481754	-1.83865	0.672222	0.501607	0.701843
hsa-mir-3920	0.0471046	-2.09106	0.723439	0.46959	0.68275
hsa-mir-766	0.0468056	2.77366	0.604596	0.545593	0.735519
hsa-mir-7976	0.0466958	-2.17094	0.829064	0.407278	0.632276
hsa-mir-155	0.0465905	8.3918	0.513985	0.607383	0.779412
hsa-mir-4651	0.0456212	-2.36613	1.35953	0.174305	0.368085
hsa-mir-4435-2	0.0451252	-2.3621	1.35709	0.175078	0.368698
hsa-mir-548ay	0.0446863	-2.24656	0.903218	0.366641	0.593622
hsa-mir-4443	0.0444628	-1.53406	0.503653	0.614623	0.784592
hsa-mir-1197	0.0439093	-2.22028	0.97387	0.330371	0.555453
hsa-mir-6845	0.0437312	-2.3661	1.31145	0.190023	0.388309
hsa-mir-4676	0.0434255	-1.76644	0.53613	0.591995	0.764277
hsa-mir-9-2	0.0434022	7.97178	0.253509	0.79993	0.903964
hsa-mir-219b	0.0428338	-1.31817	0.437279	0.662009	0.822738
hsa-mir-543	0.0428024	-0.101252	0.393583	0.693978	0.849199
hsa-mir-6814	0.0427013	-2.24665	0.811094	0.417516	0.637769
hsa-mir-642b	0.0423361	-2.31041	0.847114	0.397146	0.62314
hsa-mir-1227	0.0422958	-2.20998	0.806329	0.420256	0.638448
hsa-mir-3923	0.0415962	-2.26451	0.6025	0.546986	0.736437
hsa-mir-550b-2	0.0414994	-2.41755	1.72859	0.0842096	0.237993
hsa-mir-4435-1	0.0414731	-2.36513	1.30281	0.192957	0.392751
hsa-mir-514a-2	0.0406226	-0.670798	0.336958	0.736224	0.874001
hsa-mir-4789	0.0404278	-2.22984	0.82089	0.411916	0.633812
hsa-mir-4766	0.0397868	-1.28951	0.37232	0.709738	0.853573
hsa-mir-5692a-1	0.0396442	-2.44662	2.54577	0.0110619	0.062113
hsa-mir-4762	0.0393696	-1.62462	0.471107	0.637673	0.80409
hsa-mir-509-1	0.0392566	-0.128778	0.349365	0.726893	0.864911
hsa-mir-3152	0.0387543	-2.09611	0.606095	0.544597	0.735135
hsa-mir-5008	0.0387111	-2.10954	0.591716	0.554182	0.738673
hsa-mir-3940	0.0381119	-0.277639	0.327332	0.74349	0.877589
hsa-mir-373	0.0380638	-2.279	0.833821	0.404593	0.630044
hsa-mir-4733	0.0374546	-2.11219	0.667021	0.504922	0.703624
hsa-mir-4445	0.0372429	-2.44135	1.78611	0.0744028	0.222348
hsa-mir-3145	0.0371494	-2.25155	0.789803	0.429841	0.647858
hsa-mir-365b	0.0363348	6.40712	0.506084	0.612916	0.783381
hsa-mir-518d	0.0359547	-2.44596	2.02877	0.0427625	0.152998
hsa-mir-374b	0.0356892	5.76351	0.693184	0.488365	0.69555
hsa-mir-6804	0.0348624	-2.34346	0.930336	0.352435	0.579361
hsa-mir-24-1	0.0345785	9.181	0.635232	0.525431	0.720552
hsa-mir-4773-1	0.0344879	-2.19746	0.649517	0.516162	0.712127
hsa-mir-3158-1	0.0338764	-1.86236	0.477953	0.632794	0.80185
hsa-mir-10b	0.0337902	15.735	0.413903	0.679039	0.836861
hsa-mir-1537	0.0331661	-1.6848	0.380662	0.70354	0.852392
hsa-mir-4487	0.0330249	-2.30668	0.769336	0.441887	0.660276
hsa-mir-5571	0.0327091	-1.99688	0.425624	0.670479	0.831265
hsa-mir-4691	0.0326616	-2.12791	0.567014	0.57084	0.745263
hsa-mir-3936	0.0324527	-2.19955	0.582356	0.560466	0.739971
hsa-mir-6746	0.0322925	-2.26133	0.687059	0.492214	0.697191
hsa-mir-3616	0.032291	-2.15294	0.512571	0.608371	0.779499
hsa-mir-548at	0.0322309	-2.34964	0.863619	0.388017	0.612013
hsa-mir-3177	0.0322286	-2.15514	0.593315	0.553113	0.738673
hsa-mir-365a	0.0319314	6.41942	0.441651	0.658843	0.819788
hsa-mir-1538	0.0317401	-1.75016	0.413998	0.67897	0.836861
hsa-mir-6846	0.0315767	-2.38235	1.00738	0.314009	0.546609
hsa-mir-103a-2	0.0299649	13.1918	0.453595	0.650224	0.811016
hsa-mir-4713	0.0299047	-2.34904	0.80593	0.420487	0.638448
hsa-mir-6513	0.0298384	-2.1017	0.497484	0.618964	0.787218
hsa-mir-548az	0.0297724	-2.26777	0.589884	0.555409	0.738673
hsa-mir-4701	0.0297236	-2.24376	0.58041	0.561777	0.739971
hsa-mir-5685	0.0292514	-2.19837	0.541822	0.588069	0.761984
hsa-mir-675	0.0292078	4.68562	0.249888	0.802728	0.905148
hsa-mir-548k	0.0286171	-1.80128	0.374797	0.707896	0.853573
hsa-mir-146b	0.0281138	9.22876	0.373152	0.709119	0.853573
hsa-mir-4454	0.0278938	-1.98123	0.361047	0.718145	0.859447
hsa-mir-6744	0.0274297	-2.1208	0.371148	0.710611	0.853573
hsa-mir-4641	0.0271816	-2.37525	0.791397	0.428911	0.647858
hsa-mir-151a	0.0269302	10.9786	0.457606	0.647341	0.808394
hsa-mir-190b	0.0268363	3.32732	0.138468	0.8899	0.951558
hsa-mir-6824	0.0267653	-2.31647	0.669826	0.503133	0.702077
hsa-mir-3654	0.0261358	-1.9582	0.314483	0.753224	0.882031
hsa-mir-6743	0.0261082	-2.29528	0.637959	0.523655	0.720026
hsa-mir-3650	0.0256873	-2.3212	0.595467	0.551675	0.738673
hsa-mir-4697	0.0254997	-2.30415	0.573566	0.566398	0.743218
hsa-mir-548ba	0.025312	-2.32675	0.685737	0.493048	0.697416
hsa-mir-7-1	0.0248823	4.90046	0.291246	0.770928	0.892703
hsa-mir-4524a	0.0248069	-2.11035	0.421292	0.673638	0.834181
hsa-mir-3161	0.024637	-1.80021	0.259868	0.795023	0.902364
hsa-mir-6723	0.0245769	-2.09646	0.406698	0.684322	0.841366
hsa-mir-340	0.0245054	4.65691	0.400958	0.688542	0.844546
hsa-mir-5094	0.024071	-2.3297	0.587185	0.55722	0.738673
hsa-mir-4484	0.0240126	-1.81814	0.297043	0.766499	0.892522
hsa-mir-551b	0.0239887	0.0431164	0.195598	0.844967	0.926507
hsa-mir-4778	0.0238269	-2.42422	1.14358	0.253088	0.474081
hsa-mir-494	0.0236491	0.193358	0.198767	0.842488	0.925899
hsa-mir-5706	0.0235737	-1.52306	0.269464	0.787632	0.901567
hsa-mir-1250	0.0235233	-2.02745	0.349823	0.72655	0.864911
hsa-mir-3125	0.0231046	-2.35017	0.658614	0.510304	0.707312
hsa-mir-7152	0.0223267	-2.20962	0.4978	0.618741	0.787218
hsa-mir-6753	0.0217238	-2.41454	0.843451	0.39919	0.624451
hsa-mir-545	0.0215393	-0.950494	0.213124	0.831276	0.920278
hsa-mir-670	0.0213458	-2.43683	0.926078	0.354642	0.580222
hsa-mir-3143	0.0206334	-2.12909	0.325099	0.745178	0.877822
hsa-mir-6514	0.0203885	-1.2862	0.218496	0.82709	0.920278
hsa-mir-607	0.0201017	-1.74761	0.236763	0.812892	0.912851
hsa-mir-141	0.0193643	10.7494	0.228928	0.818975	0.916472
hsa-mir-891b	0.0190608	-2.42128	0.62527	0.531945	0.726829
hsa-mir-561	0.0190459	-1.86616	0.261231	0.793971	0.902364
hsa-mir-532	0.0186956	9.23741	0.327899	0.743061	0.877589
hsa-mir-326	0.0184041	2.54073	0.143089	0.886251	0.950605
hsa-mir-28	0.0183191	11.8809	0.378922	0.704831	0.852392
hsa-mir-23b	0.0178222	9.3855	0.2576	0.796772	0.903358
hsa-mir-6764	0.0177302	-1.96614	0.281886	0.778093	0.897933
hsa-mir-4474	0.0175538	-2.36752	0.61197	0.540705	0.731792
hsa-mir-3195	0.0175096	-2.39001	0.825875	0.409084	0.632276
hsa-mir-765	0.0171656	-1.78878	0.207657	0.835542	0.923024
hsa-mir-5582	0.0166301	-2.18008	0.291189	0.770971	0.892703
hsa-mir-1914	0.0166023	-2.05175	0.264923	0.791127	0.901687
hsa-mir-122	0.0159201	-2.24611	0.25232	0.800849	0.904015
hsa-mir-6844	0.0158011	-1.96216	0.214256	0.830393	0.920278
hsa-mir-484	0.0156749	6.28598	0.254252	0.799356	0.903964
hsa-mir-6766	0.0156281	-2.20378	0.298635	0.765285	0.892113
hsa-mir-548o	0.0153056	-1.54724	0.185593	0.852803	0.93115
hsa-mir-6504	0.0152221	-2.38723	0.461873	0.644279	0.807496
hsa-mir-3610	0.0151522	-0.16532	0.135994	0.891855	0.952663
hsa-mir-6810	0.0147924	-2.15851	0.264035	0.791811	0.901687
hsa-mir-5681b	0.0138873	-2.12833	0.208479	0.8349	0.923024
hsa-mir-548al	0.0138772	-2.34995	0.324826	0.745384	0.877822
hsa-mir-4632	0.0137037	-2.10725	0.234983	0.814273	0.913187
hsa-mir-632	0.0136124	-1.4391	0.139586	0.889017	0.951558
hsa-mir-371a	0.0131006	-2.35993	0.382458	0.702208	0.852392
hsa-mir-5002	0.0120087	-2.102	0.196975	0.843889	0.926307
hsa-mir-224	0.0119114	3.81715	0.073863	0.941135	0.979538
hsa-mir-888	0.0118377	-2.43298	0.529692	0.59645	0.768989
hsa-mir-2110	0.011251	0.930874	0.122464	0.902558	0.956193
hsa-mir-935	0.0111459	0.25127	0.0689145	0.945072	0.979538
hsa-mir-7114	0.0108296	-2.3118	0.265984	0.79031	0.901687
hsa-mir-4687	0.0106856	-2.0622	0.179442	0.857629	0.931486
hsa-mir-381	0.0104584	4.41098	0.106269	0.915391	0.963864
hsa-mir-548a-3	0.0104103	-2.35987	0.284771	0.775882	0.897385
hsa-mir-6751	0.0103383	-2.21054	0.191373	0.848274	0.929036
hsa-mir-4675	0.0101171	-1.83534	0.0939203	0.925192	0.970232
hsa-mir-3140	0.0100204	-2.0607	0.150732	0.88022	0.947083
hsa-mir-27a	0.00976712	9.85898	0.16544	0.868633	0.938445
hsa-mir-1909	0.00960229	-2.34401	0.276426	0.782281	0.900756
hsa-mir-939	0.00959438	0.018667	0.0912032	0.92735	0.97151
hsa-mir-5585	0.00930032	-2.41886	0.377205	0.706106	0.852937
hsa-mir-6825	0.00880503	-2.27225	0.18921	0.849969	0.929036
hsa-mir-1276	0.00877752	-1.88544	0.117776	0.90627	0.958163
hsa-mir-517c	0.00855313	-2.2469	0.153333	0.878168	0.94644
hsa-mir-6767	0.00840686	-2.27048	0.189629	0.849641	0.929036
hsa-mir-5697	0.00830241	-2.38637	0.26757	0.789089	0.901567
hsa-mir-4775	0.00762601	-2.16843	0.149289	0.881358	0.947322
hsa-mir-3911	0.00761096	-2.0856	0.114912	0.90854	0.959581
hsa-mir-4461	0.00699734	-0.898896	0.0603944	0.951854	0.979538
hsa-mir-3681	0.00682823	-2.33608	0.182484	0.855242	0.931486
hsa-mir-4739	0.0066447	-2.27284	0.123459	0.90177	0.956193
hsa-mir-4306	0.00646531	-2.26914	0.134177	0.893291	0.953213
hsa-mir-433	0.00632431	-0.233276	0.056286	0.955126	0.980735
hsa-mir-4735	0.00578696	-2.37571	0.178311	0.858517	0.931486
hsa-mir-411	0.00530685	2.07585	0.0463667	0.963028	0.985446
hsa-mir-3199-2	0.00523641	-0.654747	0.0533006	0.957504	0.982201
hsa-mir-625	0.00522073	7.72517	0.0603712	0.951873	0.979538
hsa-mir-4423	0.00520909	-1.61062	0.059813	0.952317	0.979538
hsa-mir-3115	0.00509777	-2.28957	0.123383	0.90183	0.956193
hsa-let-7i	0.00500725	8.94401	0.126759	0.899158	0.955529
hsa-mir-1226	0.00460633	0.0887388	0.0400548	0.968058	0.986887
hsa-mir-5087	0.00431415	-2.33437	0.111801	0.911005	0.961203
hsa-mir-6832	0.00413378	-2.18361	0.0625139	0.950167	0.979538
hsa-mir-4433a	0.00407943	-2.34129	0.119359	0.905016	0.957817
hsa-mir-137	0.00333592	-1.68576	0.0353868	0.971779	0.986887
hsa-mir-4482	0.00314503	-2.16215	0.0610328	0.951346	0.979538
hsa-mir-4757	0.00260478	-2.28643	0.0624384	0.950227	0.979538
hsa-mir-6821	0.00250337	-2.31319	0.059261	0.952757	0.979538
hsa-mir-6895	0.00239819	-2.00739	0.0337388	0.973093	0.986887
hsa-mir-516b-2	0.00235936	-2.24288	0.040498	0.967705	0.986887
hsa-mir-519e	0.00210965	-2.41847	0.0760468	0.939398	0.979538
hsa-mir-32	0.00126024	4.64749	0.0188897	0.984933	0.991646
hsa-mir-876	0.00117982	-2.34424	0.0296054	0.976388	0.986887
hsa-mir-4747	0.000999411	-2.38295	0.0310363	0.975247	0.986887
hsa-mir-6502	0.000794132	-1.47639	0.00849121	0.993227	0.995932
hsa-mir-6747	0.000422209	-1.98701	0.00630723	0.994969	0.995932
hsa-mir-513c	0.000312275	-2.29196	0.00749076	0.994025	0.995932
hsa-mir-4707	0.00010198	-1.69955	0.00115368	0.99908	0.99908
hsa-mir-6715b	-0.000408813	-2.31606	-0.00917465	0.992682	0.995932
hsa-mir-578	-0.000532846	-2.22015	-0.0102868	0.991795	0.995932
hsa-mir-151b	-0.000631743	0.649221	-0.00683064	0.994551	0.995932
hsa-mir-4647	-0.0014325	-2.23056	-0.0301381	0.975963	0.986887
hsa-mir-6741	-0.00145727	-2.15286	-0.0250123	0.98005	0.988656
hsa-mir-6878	-0.00179048	-2.21888	-0.0335658	0.973231	0.986887
hsa-mir-6784	-0.00183321	-2.33646	-0.0457412	0.963526	0.985446
hsa-mir-541	-0.00212281	-1.03027	-0.0207381	0.983459	0.991127
hsa-mir-4768	-0.00231896	-2.2303	-0.0520929	0.958466	0.982214
hsa-mir-514b	-0.00233431	-2.36808	-0.071975	0.942637	0.979538
hsa-mir-4758	-0.00233884	-1.7167	-0.026545	0.978828	0.988387
hsa-mir-6868	-0.00246542	-1.70639	-0.0312966	0.97504	0.986887
hsa-mir-6875	-0.00271183	-1.65653	-0.0319044	0.974555	0.986887
hsa-mir-4433b	-0.00306391	-2.31518	-0.072394	0.942304	0.979538
hsa-mir-520f	-0.00327106	-2.08119	-0.0395325	0.968474	0.986887
hsa-mir-490	-0.00369425	-2.28313	-0.067794	0.945964	0.979538
hsa-mir-5188	-0.00397758	-2.3189	-0.0975126	0.92234	0.968223
hsa-mir-3615	-0.00460859	1.31412	-0.0361614	0.971161	0.986887
hsa-mir-5708	-0.00482858	-1.85481	-0.0589395	0.953013	0.979538
hsa-mir-16-1	-0.00531198	8.25335	-0.0794435	0.936697	0.979317
hsa-mir-665	-0.00580434	-1.30049	-0.0611236	0.951274	0.979538
hsa-mir-4422	-0.00596817	-2.30851	-0.152651	0.878706	0.94644
hsa-mir-6771	-0.00671165	-2.41097	-0.268684	0.788232	0.901567
hsa-mir-3663	-0.00689836	-2.44533	-0.711603	0.476887	0.687731
hsa-mir-1228	-0.00690903	-0.0491651	-0.0693391	0.944734	0.979538
hsa-mir-3926-2	-0.00701057	-0.449887	-0.0630961	0.949703	0.979538
hsa-mir-513a-1	-0.00742002	-2.41641	-0.322428	0.7472	0.878959
hsa-mir-4770	-0.00800769	-2.32041	-0.204659	0.837883	0.924622
hsa-mir-7641-2	-0.00820237	-2.1483	-0.131775	0.89519	0.953272
hsa-mir-4692	-0.00847151	-2.42485	-0.473454	0.635999	0.80409
hsa-mir-6873	-0.00861698	-2.38746	-0.293258	0.76939	0.892703
hsa-mir-500a	-0.00875813	7.67669	-0.127965	0.898204	0.955497
hsa-mir-6850	-0.00951376	-2.21831	-0.167396	0.867095	0.937841
hsa-mir-519b	-0.00955356	-2.36117	-0.236507	0.81309	0.912851
hsa-mir-92a-2	-0.00960641	11.6806	-0.132849	0.894341	0.953272
hsa-mir-769	-0.00965579	4.76876	-0.183438	0.854494	0.931486
hsa-mir-877	-0.0103386	0.442167	-0.0844626	0.932707	0.976132
hsa-mir-6888	-0.01063	-2.18965	-0.201034	0.840715	0.925771
hsa-mir-6806	-0.0107695	-0.02223	-0.104366	0.916901	0.964243
hsa-mir-3688-1	-0.010969	-2.37463	-0.333213	0.739048	0.876348
hsa-mir-6730	-0.011115	-2.10271	-0.180672	0.856664	0.931486
hsa-mir-4660	-0.011179	-1.10782	-0.103465	0.917616	0.964243
hsa-mir-6782	-0.0114732	-2.32169	-0.270979	0.786466	0.901559
hsa-mir-4773-2	-0.011496	-2.14686	-0.198596	0.842622	0.925899
hsa-mir-16-2	-0.011783	8.28288	-0.174975	0.861137	0.93335
hsa-mir-1265	-0.0118993	-2.35758	-0.282525	0.777603	0.897933
hsa-mir-487a	-0.0119785	0.0563034	-0.107933	0.914072	0.963456
hsa-mir-6860	-0.0120883	-1.77181	-0.146256	0.883751	0.948908
hsa-mir-26b	-0.0122872	9.39725	-0.214425	0.830262	0.920278
hsa-mir-1185-2	-0.012465	-2.04709	-0.215153	0.829695	0.920278
hsa-mir-6885	-0.0128924	-2.08903	-0.218806	0.826849	0.920278
hsa-mir-6736	-0.0132466	-2.27869	-0.303742	0.761392	0.888669
hsa-mir-2113	-0.013798	-2.439	-0.769516	0.44178	0.660276
hsa-mir-6775	-0.0140064	-2.37389	-0.405124	0.685478	0.841787
hsa-mir-3148	-0.0145663	-2.4114	-0.567846	0.570274	0.745263
hsa-mir-600	-0.0148229	-2.16908	-0.273753	0.784334	0.901385
hsa-mir-3928	-0.0148487	0.647421	-0.139573	0.889027	0.951558
hsa-mir-146a	-0.0155041	6.66743	-0.164379	0.869468	0.938445
hsa-mir-3684	-0.016028	-1.86202	-0.217126	0.828157	0.920278
hsa-mir-6818	-0.0165928	-1.90102	-0.213385	0.831073	0.920278
hsa-mir-6892	-0.0170953	1.02467	-0.168605	0.866144	0.937793
hsa-mir-3529	-0.0173843	-2.43803	-1.03435	0.301238	0.530631
hsa-mir-6754	-0.0177181	-2.25344	-0.370947	0.710761	0.853573
hsa-mir-515-2	-0.0179896	-2.25531	-0.303917	0.761258	0.888669
hsa-mir-6880	-0.0181503	-2.28763	-0.394957	0.692964	0.848963
hsa-mir-4654	-0.0184633	-2.15483	-0.317734	0.750757	0.880774
hsa-mir-641	-0.0186421	-2.01522	-0.277244	0.781653	0.900756
hsa-mir-6865	-0.018645	-2.42136	-0.86099	0.389463	0.612013
hsa-mir-377	-0.0190206	1.1814	-0.178626	0.85827	0.931486
hsa-mir-4794	-0.0191214	-2.33362	-0.471156	0.637639	0.80409
hsa-mir-524	-0.0191869	-2.36779	-0.457688	0.647282	0.808394
hsa-mir-3137	-0.0193024	-2.24192	-0.385614	0.69987	0.852374
hsa-mir-6871	-0.0200153	-2.33566	-0.587672	0.556893	0.738673
hsa-mir-548o-2	-0.0201932	-1.56055	-0.233803	0.815188	0.913223
hsa-mir-339	-0.0202761	5.52006	-0.327672	0.743232	0.877589
hsa-mir-362	-0.0202997	3.16209	-0.243903	0.807359	0.909378
hsa-mir-4755	-0.0203547	-2.15873	-0.381185	0.703152	0.852392
hsa-mir-3199-1	-0.0209231	-1.68969	-0.271612	0.785979	0.901559
hsa-mir-6720	-0.0209417	-1.16277	-0.202946	0.839221	0.925112
hsa-mir-200c	-0.0212683	13.3399	-0.273445	0.784571	0.901385
hsa-mir-4494	-0.0213022	-2.35228	-0.610549	0.541646	0.732107
hsa-mir-124-2	-0.0216349	-2.28706	-0.390342	0.696372	0.851121
hsa-mir-1912	-0.0218565	-2.42311	-1.03295	0.301892	0.530879
hsa-mir-892b	-0.0219614	-2.44403	-1.11093	0.266883	0.491026
hsa-mir-92a-1	-0.0223166	11.9093	-0.293544	0.769171	0.892703
hsa-mir-3138	-0.0228	-2.18771	-0.442701	0.658084	0.819788
hsa-mir-662	-0.0228084	-2.41037	-0.822975	0.41073	0.632929
hsa-mir-6807	-0.0233834	-2.07586	-0.351859	0.725023	0.864911
hsa-mir-1260b	-0.0235359	-2.26385	-0.540636	0.588886	0.762088
hsa-mir-4473	-0.0235652	-1.0724	-0.223034	0.823558	0.91961
hsa-mir-197	-0.0238334	8.11473	-0.36981	0.711607	0.853599
hsa-mir-18a	-0.0254585	2.95427	-0.237576	0.812262	0.912851
hsa-mir-410	-0.0275491	2.55508	-0.225398	0.821718	0.918548
hsa-mir-380	-0.027745	-0.74408	-0.260115	0.794832	0.902364
hsa-let-7d	-0.0277681	8.96879	-0.544097	0.586503	0.760909
hsa-mir-498	-0.0279756	-2.38741	-0.825933	0.409051	0.632276
hsa-mir-7151	-0.0281905	-2.3331	-0.650662	0.515423	0.712127
hsa-mir-6758	-0.0284644	-2.31171	-0.700472	0.483805	0.692874
hsa-mir-30e	-0.028709	13.5663	-0.599616	0.548906	0.737102
hsa-mir-5680	-0.0287173	-1.75612	-0.320852	0.748394	0.879363
hsa-mir-6729	-0.0289866	-2.33318	-0.810997	0.417572	0.637769
hsa-mir-6855	-0.0294454	-2.19521	-0.570237	0.568653	0.745231
hsa-mir-4479	-0.0297599	-2.25633	-0.67578	0.499346	0.700855
hsa-mir-3618	-0.0297652	-2.19967	-0.577743	0.563576	0.740494
hsa-mir-551a	-0.0298838	-1.72544	-0.329017	0.742216	0.877589
hsa-mir-18b	-0.0302227	-1.15337	-0.292767	0.769764	0.892703
hsa-mir-3622b	-0.0303807	-2.30768	-0.837713	0.402404	0.628529
hsa-mir-5687	-0.0307462	-1.7512	-0.383774	0.701232	0.852392
hsa-mir-378i	-0.03094	-2.4216	-1.10602	0.269002	0.49317
hsa-mir-27b	-0.0311602	9.02649	-0.471544	0.637362	0.80409
hsa-mir-7161	-0.0316158	-2.31741	-0.785942	0.432099	0.649404
hsa-mir-611	-0.0316621	-2.34345	-0.864659	0.387446	0.612013
hsa-mir-3680-2	-0.0316853	-2.14184	-0.580977	0.561395	0.739971
hsa-mir-4678	-0.0318217	-2.36406	-0.92864	0.353313	0.579882
hsa-mir-147b	-0.0320762	-0.307783	-0.256015	0.797995	0.903753
hsa-mir-3913-1	-0.032183	0.636003	-0.31702	0.751299	0.880774
hsa-mir-346	-0.0321856	-1.96015	-0.462683	0.643699	0.807496
hsa-mir-2682	-0.0322082	-2.39047	-1.05359	0.292341	0.520409
hsa-mir-4792	-0.0322818	-2.39536	-0.987105	0.323844	0.55029
hsa-mir-186	-0.0323234	8.15351	-0.620855	0.534845	0.727891
hsa-mir-3611	-0.0327582	-2.25648	-0.683536	0.494436	0.697472
hsa-mir-4525	-0.033277	-2.13959	-0.551221	0.581613	0.756462
hsa-mir-6740	-0.0336112	-2.24515	-0.730669	0.465163	0.680309
hsa-mir-6833	-0.0336261	-1.98645	-0.522291	0.60159	0.774651
hsa-mir-519c	-0.0337166	-2.17614	-0.490217	0.624094	0.792768
hsa-mir-3192	-0.0349036	-2.22075	-0.665183	0.506096	0.704311
hsa-mir-4664	-0.0350446	-0.843166	-0.303638	0.761471	0.888669
hsa-mir-1910	-0.0350582	-1.5618	-0.351194	0.725521	0.864911
hsa-mir-106b	-0.0350907	8.99743	-0.587753	0.556839	0.738673
hsa-mir-107	-0.0353635	5.8729	-0.616909	0.537444	0.728331
hsa-mir-4444-2	-0.0354645	-0.666986	-0.365053	0.715154	0.856858
hsa-mir-3135a	-0.0355222	-2.43534	-1.63299	0.102806	0.259247
hsa-mir-216b	-0.0359779	-2.28662	-0.869165	0.384978	0.612013
hsa-mir-491	-0.0364315	1.77061	-0.434617	0.66394	0.824146
hsa-mir-4740	-0.0368214	-2.25603	-0.897793	0.369525	0.595296
hsa-mir-3194	-0.0370313	-1.66781	-0.484043	0.628468	0.797345
hsa-mir-3154	-0.0371666	-2.21225	-0.762945	0.445687	0.6622
hsa-mir-4529	-0.0374655	-2.18428	-0.81714	0.414055	0.636156
hsa-mir-660	-0.0375409	4.84755	-0.518854	0.603984	0.776766
hsa-mir-4745	-0.0383937	-1.88347	-0.462539	0.643801	0.807496
hsa-mir-505	-0.0390941	5.15817	-0.513747	0.607549	0.779412
hsa-mir-605	-0.0395107	-1.34056	-0.386884	0.698929	0.852232
hsa-mir-6718	-0.0396092	-1.09581	-0.34424	0.730743	0.868492
hsa-mir-5703	-0.0399038	-1.82531	-0.536042	0.592056	0.764277
hsa-mir-639	-0.0400571	-0.995847	-0.418123	0.675953	0.836047
hsa-mir-4677	-0.0404501	3.21088	-0.618253	0.536558	0.728331
hsa-mir-4716	-0.0404692	-2.28632	-0.931097	0.352042	0.579361
hsa-mir-4767	-0.0404926	-2.32797	-1.04376	0.296865	0.525614
hsa-mir-1298	-0.0416563	-2.30848	-1.08347	0.278875	0.506175
hsa-mir-6887	-0.0417041	-2.28261	-0.985011	0.324871	0.55029
hsa-mir-4723	-0.0417049	-2.27401	-0.907122	0.364574	0.591789
hsa-mir-7157	-0.0417169	-2.38699	-1.21796	0.223545	0.428841
hsa-mir-6843	-0.0420369	-1.96503	-0.583502	0.559695	0.739971
hsa-mir-3653	-0.0422764	2.99196	-0.416242	0.677327	0.836746
hsa-mir-7155	-0.0425524	-2.02129	-0.648943	0.516533	0.712127
hsa-mir-4451	-0.0426331	-2.27675	-0.72778	0.466929	0.680966
hsa-mir-1323	-0.042829	-2.21386	-0.742491	0.457975	0.671696
hsa-mir-6805	-0.0428759	-2.17006	-0.830764	0.406317	0.631778
hsa-mir-4492	-0.042908	-2.06303	-0.660087	0.509359	0.707312
hsa-mir-6717	-0.0430574	-2.28889	-0.992188	0.32136	0.549379
hsa-mir-520e	-0.0433122	-2.24692	-0.674399	0.500223	0.700855
hsa-mir-7974	-0.0433307	-1.80063	-0.499327	0.617665	0.787218
hsa-mir-6840	-0.0437148	-2.32565	-0.997632	0.318714	0.54925
hsa-mir-6870	-0.0439435	-2.28822	-1.08831	0.276736	0.504242
hsa-mir-1252	-0.0440977	-2.31085	-1.00119	0.316993	0.548471
hsa-mir-4421	-0.0441983	-2.34055	-1.26964	0.204526	0.407946
hsa-mir-1271	-0.0444814	1.32098	-0.467704	0.640104	0.805192
hsa-mir-6858	-0.0446874	-2.27356	-1.04136	0.297976	0.52668
hsa-mir-6812	-0.0447916	-2.19503	-0.836416	0.403133	0.628717
hsa-mir-7850	-0.0448185	-2.34786	-1.2507	0.211355	0.41565
hsa-mir-6757	-0.0450167	-2.29872	-0.9844	0.325171	0.55029
hsa-mir-7705	-0.0455442	-0.137418	-0.408084	0.683305	0.841116
hsa-mir-206	-0.0456527	-1.74261	-0.387276	0.69864	0.852232
hsa-mir-515-1	-0.0456912	-2.25595	-0.800215	0.423788	0.641699
hsa-mir-3193	-0.0470375	-1.97683	-0.753867	0.451117	0.664466
hsa-mir-3178	-0.0474183	-1.92465	-0.657112	0.51127	0.707701
hsa-mir-6786	-0.047812	-2.32996	-1.23334	0.217757	0.420076
hsa-mir-3186	-0.0479826	-2.40357	-1.657	0.0978513	0.258108
hsa-mir-938	-0.0483166	-2.37349	-1.55039	0.121383	0.291205
hsa-mir-4419b	-0.0492087	-2.3821	-1.68918	0.0915156	0.247732
hsa-mir-4533	-0.0498621	-2.27452	-1.02334	0.306409	0.536995
hsa-mir-1246	-0.0499674	-2.39064	-1.63489	0.102405	0.259247
hsa-mir-3117	-0.0501655	-1.1483	-0.460257	0.645438	0.80797
hsa-mir-527	-0.050596	-2.11032	-0.624676	0.532335	0.726829
hsa-mir-7846	-0.0508932	-2.13534	-0.908893	0.363639	0.591199
hsa-mir-4754	-0.0510616	-2.1567	-0.961491	0.336552	0.563098
hsa-mir-548d-1	-0.0510627	-1.97691	-0.632399	0.52728	0.722129
hsa-mir-7110	-0.0515303	-1.97543	-0.728684	0.466376	0.680966
hsa-mir-4434	-0.0520823	-1.97127	-0.714849	0.474879	0.686748
hsa-mir-581	-0.0523332	-1.0044	-0.510304	0.609958	0.780565
hsa-mir-6731	-0.0529585	-2.2056	-1.13218	0.257847	0.479521
hsa-mir-4453	-0.0530641	-2.02183	-0.725337	0.468425	0.682185
hsa-mir-521-2	-0.0531209	-2.35154	-1.28988	0.19741	0.397899
hsa-mir-516b-1	-0.0532427	-2.16446	-0.813985	0.415859	0.637034
hsa-mir-6728	-0.0534965	-2.09047	-0.80659	0.420106	0.638448
hsa-mir-3622a	-0.0540392	-1.97137	-0.824168	0.410052	0.632827
hsa-mir-17	-0.0544105	9.01648	-0.658774	0.510202	0.707312
hsa-mir-4732	-0.0549967	-2.01922	-0.770505	0.441193	0.660276
hsa-mir-6774	-0.0552304	-2.21254	-1.12532	0.26074	0.4823
hsa-mir-324	-0.0553329	5.30316	-0.876211	0.381138	0.609115
hsa-mir-597	-0.0562127	-2.13268	-0.992015	0.321445	0.549379
hsa-mir-4749	-0.0562846	-2.23269	-1.20738	0.227589	0.433155
hsa-mir-7706	-0.0565575	0.867861	-0.558393	0.576709	0.751976
hsa-mir-942	-0.0568279	2.02155	-0.639447	0.522688	0.719653
hsa-mir-3939	-0.0573467	-2.30374	-1.41235	0.158177	0.346514
hsa-mir-7113	-0.0578927	-2.29346	-1.21077	0.226287	0.431698
hsa-mir-770	-0.0579368	-2.28945	-1.4487	0.147753	0.333573
hsa-mir-2276	-0.0584571	-1.90098	-0.788773	0.430443	0.647858
hsa-mir-4715	-0.0585745	-2.36766	-1.69123	0.0911233	0.247732
hsa-mir-4804	-0.059313	-2.34012	-1.48886	0.13686	0.319442
hsa-mir-6803	-0.0599391	-1.77602	-0.874651	0.381987	0.609528
hsa-mir-4759	-0.060232	-2.29046	-1.58021	0.114395	0.278316
hsa-mir-6856	-0.0604138	-2.34713	-1.61124	0.107463	0.265829
hsa-mir-4738	-0.0610864	-1.76243	-0.763517	0.445346	0.6622
hsa-mir-4781	-0.0612662	-1.50846	-0.701707	0.483035	0.69273
hsa-mir-500b	-0.0614978	1.92846	-0.721153	0.470994	0.683041
hsa-mir-378a	-0.0639305	7.78951	-0.826103	0.408955	0.632276
hsa-mir-548x	-0.0642496	-2.40454	-1.90599	0.0569557	0.184471
hsa-mir-5003	-0.0646068	-1.27819	-0.600231	0.548496	0.737102
hsa-mir-5696	-0.0650935	-1.67547	-0.862765	0.388486	0.612013
hsa-let-7b	-0.0652092	14.5035	-0.879145	0.379547	0.608285
hsa-mir-1295a	-0.0657712	-0.427565	-0.547934	0.583867	0.75844
hsa-mir-219a-1	-0.0662595	1.1304	-0.734269	0.462968	0.678057
hsa-mir-5682	-0.0664193	-2.36345	-1.6237	0.104775	0.260425
hsa-mir-3126	-0.0665795	-2.15496	-1.26907	0.204729	0.407946
hsa-mir-4640	-0.0666963	-1.50449	-0.722554	0.470133	0.68275
hsa-mir-7845	-0.0666979	-2.09326	-1.05452	0.291916	0.520409
hsa-mir-943	-0.0667271	-2.28842	-1.62901	0.103644	0.259247
hsa-mir-6894	-0.0668886	-2.05366	-1.08946	0.276228	0.504242
hsa-mir-588	-0.0672796	-2.32137	-1.48269	0.138491	0.320626
hsa-mir-5000	-0.0674425	0.746179	-0.681148	0.495945	0.698647
hsa-mir-612	-0.0675835	-2.20763	-1.2066	0.227888	0.433155
hsa-mir-3909	-0.0688945	-1.26884	-0.744004	0.45706	0.671306
hsa-mir-643	-0.0691019	-0.606724	-0.688483	0.491318	0.696876
hsa-mir-3190	-0.0702648	-1.44874	-0.677966	0.497959	0.700531
hsa-mir-4515	-0.0709305	-2.18406	-1.32652	0.18499	0.381795
hsa-mir-3913-2	-0.0710873	0.607495	-0.696146	0.486509	0.694866
hsa-mir-4457	-0.071286	-2.36931	-2.02135	0.0435252	0.154656
hsa-mir-518a-2	-0.0713151	-2.12619	-0.956898	0.338864	0.565138
hsa-mir-6737	-0.0717649	-1.73399	-0.879159	0.379539	0.608285
hsa-mir-4699	-0.0720901	-2.28522	-1.64166	0.100993	0.258974
hsa-mir-642a	-0.0725343	1.53717	-0.553528	0.580033	0.755358
hsa-mir-6793	-0.072615	-1.7952	-0.927046	0.35414	0.580222
hsa-mir-5588	-0.0728151	-2.22359	-1.51262	0.130711	0.30928
hsa-mir-1237	-0.0728704	-2.25658	-1.5762	0.115316	0.279243
hsa-mir-1911	-0.0734968	-2.19452	-1.29244	0.196521	0.397899
hsa-mir-887	-0.073532	2.58588	-0.620609	0.535007	0.727891
hsa-mir-523	-0.0745272	-2.33391	-1.69587	0.0902415	0.246843
hsa-mir-802	-0.0751014	-2.33995	-1.65444	0.0983718	0.25882
hsa-mir-651	-0.0756074	1.2195	-0.755084	0.450387	0.664466
hsa-mir-3680-1	-0.076391	-1.86291	-1.0198	0.308084	0.537198
hsa-mir-517b	-0.076592	-1.68399	-0.754314	0.450849	0.664466
hsa-mir-3176	-0.0768635	-1.84184	-0.955356	0.339643	0.565258
hsa-mir-488	-0.0770672	-1.78431	-1.08773	0.276992	0.504242
hsa-mir-873	-0.0771751	-2.15744	-1.23547	0.216962	0.419325
hsa-mir-517a	-0.0773716	-1.68386	-0.761862	0.446333	0.6622
hsa-mir-6826	-0.0776875	-2.25949	-1.73796	0.0825449	0.235128
hsa-mir-4519	-0.0779036	-2.1079	-1.24951	0.211788	0.41565
hsa-let-7g	-0.0783678	9.1058	-1.77585	0.0760805	0.224562
hsa-mir-124-3	-0.079224	-2.27677	-1.44439	0.148962	0.333794
hsa-mir-99a	-0.0798242	8.97821	-0.790806	0.429256	0.647858
hsa-mir-219a-2	-0.0799544	-2.07647	-1.31904	0.187476	0.385388
hsa-mir-4668	-0.0811438	1.78245	-0.704132	0.481525	0.691523
hsa-mir-502	-0.081187	2.81541	-1.34432	0.179169	0.374264
hsa-mir-128-1	-0.0813971	6.20703	-1.42693	0.153932	0.339373
hsa-mir-320c-2	-0.081526	-1.37017	-0.98093	0.326879	0.551181
hsa-mir-6834	-0.0816156	-2.2205	-1.53424	0.125306	0.298539
hsa-mir-125b-2	-0.081888	8.17468	-0.965555	0.334514	0.561506
hsa-mir-5001	-0.0824063	-1.00401	-0.870275	0.384372	0.612013
hsa-mir-520d	-0.082584	-2.20293	-1.24058	0.215068	0.417938
hsa-mir-4788	-0.0829026	-1.9432	-1.20266	0.229408	0.434447
hsa-mir-520c	-0.0829543	-2.24926	-1.41989	0.15597	0.342405
hsa-mir-6507	-0.0832017	-1.97357	-1.29468	0.195746	0.397645
hsa-mir-4522	-0.0832596	-1.89883	-1.10622	0.268911	0.49317
hsa-mir-3910-1	-0.083273	-2.26323	-1.86968	0.0618374	0.194939
hsa-mir-4796	-0.0833791	-2.24865	-1.93614	0.0531497	0.179502
hsa-mir-548ao	-0.0838881	-2.27183	-1.68422	0.0924703	0.248995
hsa-mir-4736	-0.0845073	-2.20973	-1.76605	0.0777104	0.226013
hsa-mir-574	-0.0850954	6.45889	-1.40895	0.159181	0.347977
hsa-mir-3188	-0.0854284	-1.84781	-1.11444	0.265377	0.489999
hsa-mir-1262	-0.0860513	-0.819445	-0.800075	0.423869	0.641699
hsa-mir-6734	-0.086214	-1.89997	-1.23635	0.216637	0.419325
hsa-mir-128-2	-0.0882414	5.52755	-1.35913	0.174431	0.368085
hsa-mir-6852	-0.0885138	-1.83306	-1.25742	0.208913	0.413824
hsa-mir-671	-0.0885906	2.96705	-1.45719	0.145396	0.32897
hsa-mir-4469	-0.0887048	-2.13678	-1.68915	0.0915221	0.247732
hsa-let-7c	-0.0907045	10.8184	-0.982859	0.325929	0.55067
hsa-mir-4710	-0.0910285	-2.30648	-2.20779	0.0274991	0.110335
hsa-mir-153-2	-0.091078	4.15649	-0.623936	0.532821	0.726829
hsa-mir-658	-0.0926446	-1.59185	-1.06748	0.286029	0.513578
hsa-mir-6851	-0.0927394	-2.12241	-1.58962	0.112256	0.274403
hsa-mir-5090	-0.0930345	-2.00653	-1.55115	0.121201	0.291205
hsa-mir-548f-1	-0.0935509	-2.00886	-1.1292	0.259102	0.48099
hsa-mir-4705	-0.094445	-2.2561	-2.05717	0.0399445	0.146463
hsa-mir-4665	-0.0946558	-1.76614	-1.06229	0.288378	0.516781
hsa-mir-125b-1	-0.0946685	8.07567	-1.13972	0.254691	0.476222
hsa-mir-1343	-0.0956383	-0.680626	-0.883499	0.377192	0.606558
hsa-mir-376b	-0.0966704	0.047238	-0.861967	0.388925	0.612013
hsa-mir-6132	-0.0967063	-2.18975	-1.89546	0.0583364	0.186749
hsa-mir-519d	-0.0979942	-2.14149	-1.44517	0.148744	0.333794
hsa-mir-2278	-0.0994416	-2.31083	-2.42759	0.0153856	0.075397
hsa-mir-6802	-0.0994773	-1.16188	-1.08312	0.279033	0.506175
hsa-mir-15a	-0.10031	7.10198	-1.64244	0.100832	0.258974
hsa-mir-892a	-0.10057	-2.35236	-2.45846	0.0141323	0.0709361
hsa-mir-4449	-0.100656	-1.20053	-1.02093	0.307549	0.537198
hsa-mir-452	-0.100795	4.62653	-0.770507	0.441192	0.660276
hsa-mir-1283-1	-0.101119	-2.26735	-1.61516	0.106611	0.264355
hsa-mir-518a-1	-0.101236	-2.19593	-1.47208	0.141332	0.324692
hsa-mir-4431	-0.101287	-2.28803	-2.31719	0.0207068	0.092288
hsa-mir-124-1	-0.10257	-2.26933	-1.77143	0.0768121	0.225635
hsa-mir-4505	-0.103706	-2.31293	-2.72088	0.00663079	0.043121
hsa-mir-3605	-0.104593	1.39917	-0.949198	0.342763	0.567067
hsa-mir-3173	-0.104604	-1.17752	-1.07097	0.284455	0.513578
hsa-mir-7-3	-0.104675	-0.730818	-0.845104	0.398267	0.623952
hsa-mir-544a	-0.104753	-2.21045	-2.12311	0.0340046	0.130225
hsa-mir-6797	-0.105356	-2.02317	-1.60834	0.108095	0.266119
hsa-mir-520h	-0.105366	-2.15067	-1.51344	0.130503	0.30928
hsa-mir-5581	-0.105907	-1.57459	-1.34784	0.178032	0.372643
hsa-mir-1295b	-0.106201	-2.12032	-1.34231	0.17982	0.374867
hsa-mir-3926-1	-0.106375	-0.849516	-1.06864	0.285506	0.513578
hsa-mir-2116	-0.108003	-0.945957	-1.11175	0.266529	0.491026
hsa-mir-6783	-0.108258	-1.53371	-1.24936	0.211845	0.41565
hsa-mir-6769a	-0.108761	-2.15849	-1.99278	0.0465738	0.162146
hsa-mir-4743	-0.108888	-2.25572	-2.3245	0.0203105	0.092288
hsa-mir-6750	-0.108939	-2.17458	-1.9357	0.0532033	0.179502
hsa-mir-6874	-0.109723	-1.48257	-1.24546	0.213271	0.417656
hsa-mir-1292	-0.110506	-1.00978	-1.17566	0.240028	0.452899
hsa-mir-150	-0.111056	8.81386	-0.759226	0.447907	0.662569
hsa-mir-3691	-0.111175	-1.81114	-1.48314	0.138372	0.320626
hsa-mir-378d-2	-0.111235	-1.85047	-1.66177	0.0968909	0.256228
hsa-mir-4658	-0.111372	-1.929	-1.45844	0.145053	0.32897
hsa-mir-7641-1	-0.11164	-2.13365	-1.98618	0.0473022	0.164129
hsa-mir-328	-0.112114	5.19013	-1.38703	0.165761	0.355596
hsa-mir-320e	-0.113625	-1.8568	-1.34846	0.177835	0.372643
hsa-mir-3667	-0.11411	-2.00395	-1.64969	0.0993399	0.258974
hsa-mir-6503	-0.114908	-1.35318	-1.31638	0.188366	0.385684
hsa-mir-329-2	-0.115321	-1.38677	-1.18839	0.234979	0.444182
hsa-mir-1225	-0.115467	-2.26965	-2.30033	0.0216472	0.094047
hsa-mir-1915	-0.11551	-2.32038	-2.69445	0.0071758	0.0455201
hsa-mir-580	-0.115554	-1.3401	-1.2503	0.2115	0.41565
hsa-let-7a-2	-0.11596	13.1783	-2.27601	0.0230686	0.0981604
hsa-mir-6815	-0.116527	-1.54587	-1.32423	0.185748	0.382597
hsa-mir-4680	-0.116893	-1.51327	-1.26403	0.206532	0.409893
hsa-let-7a-3	-0.116958	13.3237	-2.2177	0.0268128	0.108299
hsa-mir-6827	-0.117217	-2.23481	-2.271	0.0233715	0.0985864
hsa-let-7a-1	-0.117295	13.2295	-2.26964	0.0234548	0.0985864
hsa-mir-19b-2	-0.118207	5.75125	-1.4973	0.13465	0.314995
hsa-mir-6839	-0.118555	-2.24261	-2.51214	0.0121663	0.0648451
hsa-mir-6735	-0.119018	-2.17388	-2.14904	0.0318849	0.123944
hsa-mir-30d	-0.119051	12.7553	-1.72116	0.0855493	0.239724
hsa-mir-652	-0.119186	4.62373	-1.48225	0.138607	0.320626
hsa-mir-1296	-0.119648	2.30656	-1.46554	0.143108	0.326652
hsa-mir-143	-0.119822	14.9098	-1.26466	0.206305	0.409893
hsa-mir-6879	-0.120183	-1.98629	-1.83108	0.0674033	0.208156
hsa-mir-3620	-0.120218	-1.90112	-1.75982	0.0787622	0.226623
hsa-mir-7-2	-0.120942	-0.622917	-1.00411	0.315581	0.547502
hsa-mir-4536-2	-0.122092	-2.04262	-1.91075	0.05634	0.183915
hsa-mir-6820	-0.122264	-1.22899	-1.33389	0.18256	0.378292
hsa-mir-6837	-0.122439	0.0558084	-1.24315	0.214123	0.417938
hsa-mir-548d-2	-0.124568	-2.05832	-1.76099	0.078565	0.226623
hsa-mir-20a	-0.124857	7.56817	-1.35983	0.17421	0.368085
hsa-mir-19b-1	-0.125084	5.94803	-1.64557	0.100187	0.258974
hsa-mir-521-1	-0.125151	-2.26359	-1.93348	0.0534767	0.179529
hsa-mir-4286	-0.125231	-2.06573	-2.09976	0.0360151	0.136069
hsa-mir-7854	-0.126296	-1.60679	-1.55859	0.11943	0.287857
hsa-mir-4683	-0.127014	-1.92446	-1.72842	0.0842411	0.237993
hsa-mir-3130-2	-0.129409	0.539111	-0.999661	0.317731	0.548471
hsa-mir-3919	-0.129823	-2.06349	-1.76543	0.077815	0.226013
hsa-mir-4685	-0.129917	-1.92318	-1.96164	0.0500986	0.1721
hsa-mir-4772	-0.13085	1.58562	-1.06764	0.285955	0.513578
hsa-mir-4424	-0.131515	-1.93011	-1.9141	0.0559099	0.183915
hsa-mir-3157	-0.132191	-1.59461	-1.63308	0.102787	0.259247
hsa-mir-92b	-0.134173	6.60131	-1.47101	0.141621	0.324692
hsa-mir-508	-0.134236	2.2287	-0.902821	0.366851	0.593622
hsa-mir-6087	-0.135604	-2.23806	-2.71055	0.00683911	0.0439232
hsa-mir-499a	-0.135764	-1.3926	-1.4295	0.153192	0.338948
hsa-mir-29b-2	-0.1359	8.35095	-1.8305	0.0674912	0.208156
hsa-mir-30b	-0.136915	8.75075	-1.83404	0.0669624	0.207925
hsa-mir-6808	-0.13753	-1.29958	-1.39796	0.162455	0.351586
hsa-mir-342	-0.138008	8.52231	-1.38267	0.167094	0.356974
hsa-mir-4636	-0.138764	-1.39753	-1.53887	0.124172	0.296521
hsa-mir-133b	-0.138822	-1.73263	-1.63953	0.101436	0.258974
hsa-mir-3144	-0.140617	-2.29766	-3.21105	0.00136724	0.0127362
hsa-mir-98	-0.140911	5.85675	-2.52779	0.0116406	0.0640233
hsa-mir-5690	-0.142336	-1.78177	-1.79614	0.0727931	0.220727
hsa-mir-222	-0.14459	5.26691	-1.89683	0.0581559	0.186749
hsa-mir-1249	-0.145667	0.802189	-1.44281	0.149407	0.333794
hsa-mir-23c	-0.146371	-2.14566	-1.90359	0.057268	0.184471
hsa-mir-374c	-0.146593	-1.31072	-0.980082	0.327297	0.551181
hsa-mir-6780b	-0.14751	-2.30946	-3.5295	0.00043647	0.00559349
hsa-mir-6125	-0.147955	-1.71491	-2.06721	0.0389864	0.143459
hsa-mir-1248	-0.148543	0.488135	-1.25137	0.21111	0.41565
hsa-let-7e	-0.150857	10.0319	-2.46716	0.0137958	0.0702703
hsa-mir-29b-1	-0.15148	8.0534	-1.99437	0.0463988	0.162082
hsa-mir-372	-0.15207	-1.27133	-1.50071	0.133765	0.313634
hsa-mir-378d-1	-0.152467	-1.98856	-2.63497	0.00855253	0.0526388
hsa-mir-299	-0.153338	1.35913	-1.21601	0.224286	0.429466
hsa-mir-3942	-0.153349	-1.80238	-2.09697	0.0362618	0.136069
hsa-mir-512-2	-0.154009	-1.68557	-1.43546	0.151488	0.336134
hsa-mir-338	-0.154009	7.87952	-1.40773	0.159541	0.348029
hsa-mir-5579	-0.15427	-2.03855	-2.5979	0.00952582	0.0566075
hsa-mir-518b	-0.154527	-1.7663	-1.69558	0.0902957	0.246843
hsa-mir-548j	-0.156333	-1.50488	-1.83586	0.0666929	0.207925
hsa-mir-361	-0.156498	8.30808	-3.28558	0.00105526	0.0105936
hsa-mir-125a	-0.15891	9.79977	-2.54802	0.0109913	0.062113
hsa-mir-6777	-0.161115	-1.10742	-1.44289	0.149385	0.333794
hsa-mir-4690	-0.161201	-2.07043	-2.83399	0.00469513	0.0328808
hsa-mir-15b	-0.162028	7.64543	-2.30886	0.021167	0.0927402
hsa-mir-3652	-0.162236	-0.594586	-1.67099	0.0950551	0.252666
hsa-mir-518e	-0.162252	-1.97454	-1.77495	0.0762295	0.224562
hsa-mir-3187	-0.162315	-1.30175	-1.83408	0.0669571	0.207925
hsa-mir-216a	-0.163122	-1.29968	-1.68621	0.0920869	0.24861
hsa-mir-4714	-0.164305	-1.34379	-1.44088	0.149949	0.333794
hsa-mir-509-2	-0.164631	-0.165967	-1.48368	0.138229	0.320626
hsa-mir-133a-2	-0.165124	-0.107051	-1.36633	0.17216	0.365531
hsa-mir-218-2	-0.16703	3.98762	-2.26592	0.0236821	0.0991388
hsa-mir-34b	-0.167978	0.817159	-1.42873	0.153412	0.338948
hsa-mir-624	-0.168754	-0.221352	-1.6622	0.0968059	0.256228
hsa-mir-4741	-0.168985	-1.9903	-2.51297	0.0121376	0.0648451
hsa-mir-221	-0.170678	6.51618	-2.08489	0.0373476	0.139413
hsa-mir-4800	-0.173676	-1.94014	-2.5314	0.0115224	0.0637118
hsa-mir-218-1	-0.174393	4.08517	-2.32253	0.0204166	0.092288
hsa-mir-1305	-0.174528	-1.96734	-2.39731	0.0167096	0.0802862
hsa-mir-3922	-0.178001	-0.828398	-1.76981	0.0770826	0.225789
hsa-mir-6781	-0.178176	-1.76882	-2.27275	0.0232658	0.0985864
hsa-mir-200a	-0.178207	9.67351	-1.882	0.0601443	0.191942
hsa-mir-5699	-0.179091	-0.657971	-1.79313	0.0732721	0.220885
hsa-mir-5691	-0.180079	-1.40143	-1.93495	0.0532952	0.179502
hsa-mir-4780	-0.182031	-2.15966	-3.23697	0.00125017	0.0121301
hsa-mir-4999	-0.1845	-0.801179	-1.8173	0.0694887	0.212578
hsa-mir-29c	-0.185031	10.607	-2.04193	0.0414366	0.151397
hsa-mir-6798	-0.185077	-1.41498	-2.09632	0.0363202	0.136069
hsa-mir-525	-0.18513	-1.95395	-2.14919	0.0318735	0.123944
hsa-mir-1224	-0.185871	-0.771517	-1.37486	0.1695	0.360624
hsa-mir-1180	-0.185987	3.11153	-1.56703	0.117444	0.283732
hsa-mir-100	-0.18657	11.1531	-2.02689	0.042955	0.153157
hsa-mir-429	-0.186857	6.62054	-1.7761	0.0760386	0.224562
hsa-mir-34c	-0.187515	3.20024	-1.602	0.109491	0.26828
hsa-mir-26a-1	-0.188236	9.70025	-3.56418	0.000383308	0.00501697
hsa-mir-656	-0.191643	-0.723731	-1.91294	0.0560579	0.183915
hsa-mir-653	-0.192084	3.71623	-1.60978	0.10778	0.265979
hsa-mir-26a-2	-0.192729	9.70124	-3.62595	0.000303321	0.00418179
hsa-mir-4709	-0.194162	-0.474337	-1.91969	0.0551985	0.183542
hsa-mir-744	-0.19511	5.16362	-2.47974	0.0133216	0.0688727
hsa-mir-489	-0.195159	-1.29631	-1.94083	0.0525769	0.179421
hsa-mir-548s	-0.196164	-1.47715	-2.22832	0.0260946	0.105811
hsa-mir-130a	-0.19635	5.92829	-2.49641	0.0127155	0.0667404
hsa-mir-520g	-0.196623	-2.01277	-2.46886	0.0137306	0.0702703
hsa-mir-1181	-0.197285	-1.77229	-2.71061	0.00683785	0.0439232
hsa-mir-330	-0.197452	4.73516	-2.4285	0.0153475	0.075397
hsa-mir-188	-0.19889	1.03554	-1.91964	0.0552046	0.183542
hsa-mir-4444-1	-0.199191	-1.25759	-2.06915	0.0388035	0.143296
hsa-mir-514a-1	-0.201073	-0.730341	-1.68167	0.0929642	0.249675
hsa-mir-4442	-0.201262	-1.57786	-2.354	0.018777	0.0862906
hsa-mir-29a	-0.202636	11.9941	-3.17532	0.00154527	0.0137742
hsa-mir-7112	-0.203282	-1.74247	-2.31977	0.0205661	0.092288
hsa-mir-891a	-0.203409	-0.278253	-1.62976	0.103487	0.259247
hsa-mir-1179	-0.205053	-1.94447	-2.76134	0.0058682	0.0394008
hsa-mir-6877	-0.206163	-1.55039	-2.46091	0.0140369	0.0708009
hsa-mir-6508	-0.206437	-1.87482	-3.02907	0.00251991	0.0203561
hsa-mir-3065	-0.208881	4.99666	-1.54365	0.12301	0.294426
hsa-mir-636	-0.216155	-1.53736	-2.2823	0.0226935	0.0977713
hsa-mir-518f	-0.217039	-1.85386	-2.32014	0.0205461	0.092288
hsa-mir-1275	-0.218704	-1.65148	-2.3123	0.0209755	0.0927402
hsa-mir-455	-0.220202	7.39853	-2.09814	0.0361584	0.136069
hsa-mir-383	-0.221526	-1.39292	-2.13494	0.0330235	0.127412
hsa-mir-548ag-2	-0.221772	-2.13097	-3.48868	0.000507848	0.00595537
hsa-mir-4786	-0.222156	-0.853656	-2.23676	0.0255353	0.105193
hsa-mir-31	-0.223276	1.94559	-1.50776	0.131951	0.310792
hsa-mir-200b	-0.223754	9.23217	-2.35515	0.0187195	0.0862906
hsa-mir-520a	-0.225043	-1.38252	-2.16248	0.0308317	0.121648
hsa-mir-335	-0.225323	6.09487	-2.08114	0.0376909	0.140188
hsa-mir-1288	-0.226344	-0.909127	-2.4541	0.0143036	0.0714489
hsa-mir-205	-0.226642	9.88258	-1.1611	0.245894	0.46228
hsa-mir-6716	-0.227646	-0.541528	-2.41064	0.0161148	0.0782289
hsa-mir-937	-0.230293	0.945199	-1.58507	0.113286	0.276267
hsa-mir-664a	-0.231766	5.29845	-3.0095	0.00268638	0.0213671
hsa-mir-153-1	-0.232098	-0.0423396	-1.71682	0.0863397	0.240734
hsa-mir-449c	-0.23343	-1.63893	-1.823	0.0686192	0.210541
hsa-mir-5586	-0.234466	1.57757	-2.15241	0.0316182	0.123838
hsa-mir-5694	-0.24008	-0.802481	-1.8747	0.0611423	0.19393
hsa-mir-139	-0.240995	5.25847	-2.56881	0.0103578	0.0594996
hsa-mir-1976	-0.242947	2.89753	-2.99761	0.00279237	0.0217091
hsa-mir-3655	-0.243749	-1.70879	-3.05432	0.00231905	0.0193379
hsa-mir-4790	-0.244791	-2.10113	-3.36039	0.000809562	0.00890518
hsa-mir-518c	-0.247948	-1.74492	-2.52466	0.011744	0.0642502
hsa-mir-378c	-0.247973	1.69994	-2.51874	0.0119422	0.0648451
hsa-mir-5193	-0.248511	-1.95403	-3.77096	0.000172745	0.00266595
hsa-mir-548e	-0.2524	-0.9749	-2.61355	0.00910342	0.0547263
hsa-mir-30c-1	-0.257219	8.67446	-3.22265	0.00131368	0.0124619
hsa-mir-1304	-0.259922	-1.19582	-2.4814	0.0132601	0.0688727
hsa-mir-449b	-0.261323	-1.12421	-1.64641	0.100013	0.258974
hsa-mir-190a	-0.262734	1.9121	-3.09172	0.00204848	0.017651
hsa-let-7f-1	-0.26458	11.3977	-3.48616	0.0005126	0.00595537
hsa-mir-6499	-0.264912	-1.83193	-2.94175	0.00334345	0.0252345
hsa-mir-140	-0.265243	9.20259	-3.64651	0.000280376	0.00394016
hsa-mir-1255a	-0.270414	-1.31908	-2.81964	0.00490852	0.0338361
hsa-mir-585	-0.273853	-1.18215	-2.6151	0.00906252	0.0547263
hsa-let-7f-2	-0.275786	11.4664	-3.49907	0.000488708	0.00595537
hsa-mir-4491	-0.276027	-1.42691	-3.23986	0.00123774	0.0121301
hsa-mir-1254-1	-0.277287	-1.22516	-2.83204	0.00472375	0.0328808
hsa-mir-212	-0.278686	1.66926	-2.92107	0.00357153	0.0263783
hsa-mir-6842	-0.282352	0.193893	-2.46193	0.0139971	0.0708009
hsa-mir-579	-0.283268	-0.942848	-2.83362	0.00470053	0.0328808
hsa-mir-520b	-0.283668	-1.75276	-2.92303	0.00354931	0.0263783
hsa-mir-483	-0.285315	1.57586	-1.98087	0.0478958	0.165081
hsa-mir-3941	-0.286118	-1.36452	-3.24308	0.00122398	0.0121301
hsa-mir-320d-1	-0.286696	-1.06604	-2.96457	0.00310731	0.0237997
hsa-mir-101-1	-0.287151	12.1239	-4.19624	2.97017e-05	0.000648973
hsa-mir-132	-0.29089	6.05748	-4.5768	5.35246e-06	0.000221426
hsa-mir-3130-1	-0.29096	0.532779	-2.25698	0.0242378	0.10065
hsa-mir-512-1	-0.291504	-1.67445	-2.75627	0.00595934	0.0394997
hsa-mir-516a-2	-0.294054	-1.45428	-2.44395	0.0147098	0.0731248
hsa-mir-3690-1	-0.301868	-0.845094	-2.99765	0.00279203	0.0217091
hsa-mir-101-2	-0.303575	12.1553	-4.3739	1.35639e-05	0.000390016
hsa-mir-550a-1	-0.304916	0.789014	-3.00585	0.0027185	0.0214574
hsa-mir-5695	-0.307315	-1.48458	-3.35413	0.000827876	0.00901077
hsa-mir-584	-0.308428	4.86366	-3.08381	0.00210317	0.0179725
hsa-mir-30c-2	-0.308562	8.92401	-3.82503	0.000139359	0.00220347
hsa-mir-6511b-2	-0.313148	0.252027	-3.19437	0.00144785	0.013171
hsa-mir-144	-0.313405	5.03046	-2.56396	0.0105024	0.0599971
hsa-mir-516a-1	-0.313455	-1.4487	-2.54778	0.0109989	0.062113
hsa-mir-181c	-0.321071	6.39264	-3.61224	0.00031959	0.0043481
hsa-mir-1229	-0.322651	-0.863568	-2.93495	0.00341691	0.025602
hsa-mir-760	-0.32285	1.00777	-2.3626	0.0183495	0.0850825
hsa-mir-1-1	-0.324058	0.524044	-2.39595	0.0167716	0.0802862
hsa-mir-6755	-0.325634	-0.80576	-3.48717	0.000510691	0.00595537
hsa-mir-138-2	-0.326651	-1.34538	-3.34298	0.000861442	0.0091828
hsa-mir-550a-2	-0.327251	0.8031	-3.33203	0.000895673	0.00945026
hsa-mir-6788	-0.328312	-1.83098	-3.97525	7.56758e-05	0.00134912
hsa-mir-320d-2	-0.329247	-1.21499	-3.52516	0.000443584	0.00559349
hsa-mir-511	-0.332651	2.33105	-2.84407	0.0045505	0.0324498
hsa-mir-7156	-0.335087	-0.714148	-2.59245	0.00967707	0.0567745
hsa-mir-5091	-0.336805	-1.54327	-4.33768	1.59511e-05	0.000445767
hsa-mir-664b	-0.341762	2.01635	-4.37365	1.35789e-05	0.000390016
hsa-mir-6733	-0.343399	-1.1266	-4.19296	3.01264e-05	0.000648973
hsa-mir-5187	-0.345486	-1.22225	-4.03192	5.97906e-05	0.00114488
hsa-mir-1-2	-0.349265	0.679142	-2.68568	0.00736548	0.046157
hsa-mir-320a	-0.350999	8.86226	-5.1048	4.0053e-07	2.9582e-05
hsa-mir-4784	-0.352333	-1.08223	-3.37538	0.000767224	0.00862293
hsa-mir-451a	-0.361128	6.83671	-2.89416	0.00388937	0.028522
hsa-mir-202	-0.362723	-0.738023	-3.29445	0.00102286	0.010369
hsa-mir-5010	-0.36321	-0.819212	-3.93996	8.75082e-05	0.00145941
hsa-mir-1258	-0.37335	-0.374545	-3.03588	0.00246427	0.0202227
hsa-mir-223	-0.373551	6.45974	-3.90638	0.000100375	0.00164743
hsa-mir-6511b-1	-0.386867	0.186628	-3.7633	0.000178041	0.00266804
hsa-mir-598	-0.391772	3.38134	-3.64853	0.000278204	0.00394016
hsa-mir-129-2	-0.395525	-0.405573	-3.19096	0.00146486	0.013171
hsa-mir-1247	-0.402068	4.00717	-2.4254	0.0154782	0.075493
hsa-mir-519a-2	-0.406843	-1.47451	-3.36422	0.000798539	0.00887838
hsa-mir-497	-0.425884	4.49609	-5.90106	5.03253e-09	8.67272e-07
hsa-mir-95	-0.427037	1.34408	-3.96174	8.00158e-05	0.00135633
hsa-mir-195	-0.431824	5.31775	-5.25106	1.86931e-07	1.61072e-05
hsa-mir-135b	-0.440201	2.19872	-2.20734	0.0275304	0.110335
hsa-mir-514a-3	-0.443146	-0.687518	-3.84412	0.000129098	0.00208574
hsa-mir-320b-1	-0.453129	0.904189	-4.42435	1.08011e-05	0.000338436
hsa-mir-1468	-0.456488	2.11093	-4.07926	4.89974e-05	0.000974294
hsa-mir-217	-0.46179	3.45295	-3.57785	0.000364068	0.00482623
hsa-mir-181d	-0.463643	4.24907	-4.41551	1.12429e-05	0.000341917
hsa-mir-3912	-0.465996	-0.462021	-4.75181	2.32987e-06	0.000120455
hsa-mir-129-1	-0.470656	-0.54153	-3.97865	7.46203e-05	0.00134912
hsa-mir-3609	-0.47729	-1.5612	-3.64502	0.000281984	0.00394016
hsa-mir-550a-3	-0.481413	-0.10397	-4.48371	8.23806e-06	0.00030422
hsa-mir-577	-0.487973	0.44532	-2.36435	0.0182634	0.0850825
hsa-mir-522	-0.491106	-1.68735	-3.82272	0.000140647	0.00220347
hsa-mir-320b-2	-0.502316	1.52387	-4.99926	6.85999e-07	4.72882e-05
hsa-mir-135a-2	-0.51167	-0.400652	-3.23415	0.00126245	0.0121301
hsa-mir-556	-0.52144	-0.682941	-4.94314	9.09561e-07	5.22492e-05
hsa-mir-133a-1	-0.524828	-0.000273688	-4.32348	1.69921e-05	0.00044705
hsa-mir-6510	-0.525931	1.11544	-2.73711	0.00631478	0.0413258
hsa-mir-5683	-0.526616	2.01214	-2.85074	0.00445687	0.0322266
hsa-mir-4521	-0.531854	-0.804442	-5.5152	4.49938e-08	4.65236e-06
hsa-mir-526b	-0.538309	-0.74769	-4.42598	1.07216e-05	0.000338436
hsa-mir-30a	-0.545808	15.5155	-4.95767	8.45726e-07	5.144e-05
hsa-mir-138-1	-0.569723	-1.27861	-5.85486	6.58676e-09	9.72958e-07
hsa-mir-486-2	-0.604241	3.86787	-4.31952	1.7294e-05	0.00044705
hsa-mir-1291	-0.605165	-0.496321	-5.717	1.45428e-08	1.87965e-06
hsa-mir-548b	-0.618206	-0.490914	-5.54428	3.83203e-08	4.40258e-06
hsa-mir-486-1	-0.623214	3.87327	-4.43101	1.04794e-05	0.000338436
hsa-mir-676	-0.623657	-0.678665	-6.86003	1.24506e-11	4.2913e-09
hsa-mir-4787	-0.623929	-1.1478	-6.8068	1.77334e-11	4.58409e-09
hsa-mir-944	-0.625372	-0.00493893	-4.64323	3.91598e-06	0.000176049
hsa-mir-1251	-0.633082	-1.19919	-4.70438	2.92687e-06	0.000137563
hsa-mir-135a-1	-0.637595	-0.511446	-4.25292	2.32025e-05	0.000570455
hsa-mir-519a-1	-0.662115	-0.774692	-4.54166	6.30439e-06	0.000250721
hsa-mir-3917	-0.709592	0.167837	-6.61338	6.28354e-11	1.29944e-08
hsa-mir-320c-1	-0.73523	-0.898384	-8.34445	2.52442e-16	1.30513e-13
hsa-mir-204	-0.796256	0.574291	-5.1502	3.16804e-07	2.51981e-05
hsa-mir-934	-0.798654	-0.421926	-4.48995	8.00539e-06	0.00030422
